# Supplementary material
Source: publisher figshare collection journal article supplement (https://sage.figshare.com/ndownloader/files/20161820)
Supplement: Supplementary file 1 [file 20161820]

**Table 2 Supplement. Effects of Financial Condition on School-District Performance**

|                                                | One-year lagged<br>financial indicators |                      | Three-year moving averages<br>of financial indicators |                      |
|------------------------------------------------|-----------------------------------------|----------------------|-------------------------------------------------------|----------------------|
|                                                | Math                                    | ELA                  | Math                                                  | ELA                  |
| <b><i>Financial Condition Measures</i></b>     |                                         |                      |                                                       |                      |
| Per-pupil year-end fund<br>balance (log)       | -0.018<br>(0.023)                       | -0.012<br>(0.019)    | -0.003<br>(0.034)                                     | -0.018<br>(0.029)    |
| Per-pupil operating<br>position (in thousands) | -0.005<br>(0.007)                       | 0.004<br>(0.006)     | -0.010<br>(0.015)                                     | 0.018<br>(0.013)     |
| Cash ratio                                     | -0.004<br>(0.005)                       | -0.001<br>(0.005)    | 0.001<br>(0.008)                                      | -0.002<br>(0.008)    |
| Per-pupil debt burden (log)                    | -0.057***<br>(0.017)                    | -0.048***<br>(0.014) | -0.068***<br>(0.024)                                  | -0.058***<br>(0.021) |
| <b><i>Control Variables</i></b>                |                                         |                      |                                                       |                      |
| Population (log)                               | 0.590*<br>(0.357)                       | 0.514**<br>(0.232)   | 0.506<br>(0.354)                                      | 0.449**<br>(0.228)   |
| % Free-lunch eligibility                       | -0.016***<br>(0.002)                    | -0.012***<br>(0.002) | -0.010***<br>(0.002)                                  | -0.008***<br>(0.001) |
| % English learners                             | 0.030<br>(0.038)                        | 0.023<br>(0.032)     | 0.054<br>(0.044)                                      | 0.044<br>(0.036)     |
| % Black                                        | 0.018**<br>(0.007)                      | -3.45e-05<br>(0.007) | 0.018**<br>(0.009)                                    | 0.001<br>(0.008)     |
| % Hispanic                                     | -0.006<br>(0.006)                       | -0.004<br>(0.005)    | -0.020**<br>(0.009)                                   | -0.013*<br>(0.008)   |
| Per-capita personal<br>income (in thousands)   | 0.021***<br>(0.004)                     | 0.016***<br>(0.004)  | 0.051***<br>(0.006)                                   | 0.036***<br>(0.005)  |
| Unemployment rate                              | -0.056**<br>(0.022)                     | -0.004<br>(0.018)    | -0.002<br>(0.027)                                     | 0.033<br>(0.022)     |
| Constant                                       | -5.181<br>(3.338)                       | -4.587**<br>(2.166)  | -6.127*<br>(3.318)                                    | -5.105**<br>(2.144)  |
| Observations                                   | 6,558                                   | 6,545                | 5,309                                                 | 5,312                |
| R <sup>2</sup>                                 | 0.073                                   | 0.067                | 0.079                                                 | 0.078                |
| District FE                                    | Yes                                     | Yes                  | Yes                                                   | Yes                  |
| Year FE                                        | Yes                                     | Yes                  | Yes                                                   | Yes                  |

Robust clustered standard errors in parentheses (clustered at the school district level)

\*\*\* p<0.01, \*\* p<0.05, \* p<0.1

*Note:*

1. The per-pupil year-end fund balance, the per-pupil operating position, the cash ratio, and the per-pupil debt burden are one-year lagged and three-year moving averaged for the two models above, respectively.

2. The number of observations varies across the models because using one-year lagged and three-year moving averages of financial indicators excludes 2006 and 2006–2008 from each of the two models, respectively.
